# Supplementary material for: Forecasting and Analyzing the Disease Burden of Aged Population in China, Based on the 2010 Global Burden of Disease Study
Source: PubMed Central journal article supplement (PMC4515648; doi:10.3390/ijerph120707172), 2015-06-25
Supplement: ijerph-12-07172-s001.pdf [file ijerph-12-07172-s001.pdf]

## Forecasting and Analyzing the Disease Burden of Aged Population in China, Based on the Global Burden of Disease Study 2010

**Table S1.** Disability adjusted life years (DALYs) for 33 communicable, neonatal, and nutritional disorders.

| Short Cause Names | Average DALYs per 100,000 (Rank in 136 Causes) |            |             |            |             |            |             |            |             |            |
|-------------------|------------------------------------------------|------------|-------------|------------|-------------|------------|-------------|------------|-------------|------------|
|                   | 60–64 Years                                    |            | 65–69 Years |            | 70–74 Years |            | 75–79 Years |            | 80–84 Years |            |
|                   | 2015                                           | 2020       | 2015        | 2020       | 2015        | 2020       | 2015        | 2020       | 2015        | 2020       |
| TB                | 167 (43)                                       | 127 (54)   | 194 (44)    | 126 (56)   | 279(37)     | 144 (52)   | 292 (36)    | 221 (46)   | 285 (39)    | 221 (47)   |
| HIV               | 110 # (60)                                     | 313 # (31) | 82 # (70)   | 133 # (55) | 61 # (82)   | 98 # (65)  | – (–)       | – (–)      | – (–)       | – (–)      |
| Diarrhea          | 56 (76)                                        | 51 (79)    | 59 (78)     | 50 (83)    | 60 (83)     | 52 (85)    | 72 (83)     | 51 (89)    | 85 (77)     | 63 (86)    |
| Typhoid           | 13 (111)                                       | 14 (108)   | 10 (113)    | 10 (111)   | 9 (115)     | 8 (112)    | 14 # (109)  | 8 (115)    | 18 (107)    | 14 # (106) |
| LRI               | 254 (32)                                       | 173 (43)   | 410 (26)    | 289 (34)   | 752 (21)    | 490 (27)   | 1386 (14)   | 988 (18)   | 2286 (10)   | 1967 (13)  |
| URI               | 7 (115)                                        | 10 * (111) | 4 (122)     | 6 (118)    | 3 (130)     | 3 (123)    | 4 * (124)   | 2 (129)    | 11 * (115)  | 4 * (122)  |
| Otitis            | 50 (81)                                        | 41 (87)    | 58 * (79)   | 48 (85)    | 79 ## (75)  | 57 * (81)  | 124 (59)    | 84 ## (73) | 180 (52)    | 148 (60)   |
| Meningitis        | 38 (90)                                        | 26 (99)    | 50 (87)     | 31 (96)    | 75 * (79)   | 44 (93)    | 103 (67)    | 71 * (79)  | 124 ## (62) | 102 (66)   |
| Enceph            | 2 (128)                                        | 2 (129)    | 3 (129)     | 2 (129)    | 3 (129)     | 2 (127)    | 3 (126)     | 2 (126)    | 4 (126)     | 3 (125)    |
| Tetanus           | 5 (123)                                        | 3 (125)    | 4 (121)     | 4 (122)    | 3 (125)     | 3 (122)    | 2 (129)     | 2 (127)    | 5 (123)     | 1 (129)    |
| Varicella         | 9 (112)                                        | 7 * (114)  | 11 (112)    | 11 (110)   | 13 (110)    | 14 (107)   | 13 (110)    | 15 (107)   | 14 (111)    | 15 (105)   |
| Malaria           | 1 (133)                                        | 0 * (133)  | 1 * (132)   | 0 (133)    | 1 ## (132)  | 1 * (130)  | 1 # (131)   | 1 ## (131) | 1 ## (131)  | 1 # (131)  |
| Leish             | 3 (125)                                        | 3 (126)    | 3 (126)     | 2 (125)    | 3 (128)     | 2 (128)    | 3 (127)     | 2 (128)    | 3 (128)     | 2 (128)    |
| Schisto           | 45 (84)                                        | 45 (82)    | 52 (85)     | 50 (84)    | 56 * (84)   | 55 (83)    | 57 ## (89)  | 56 * (85)  | 56(90)      | 55 ## (89) |
| Cysticer          | 6 * (119)                                      | 5 * (121)  | 6 * (118)   | 5 * (120)  | 6 * (119)   | 5 * (119)  | 6 * (118)   | 5 * (120)  | 6 * (121)   | 5 * (119)  |
| Echino            | 6 * (117)                                      | 6 (117)    | 7 * (116)   | 7 * (115)  | 8 (117)     | 7 * (114)  | 8 (114)     | 9 (111)    | 7 ## (117)  | 9 (111)    |
| Trachoma          | 7 (116)                                        | 7 (115)    | 9 (115)     | 8 (112)    | 13 (109)    | 11 (110)   | 20 (103)    | 17 (104)   | 24 (101)    | 27 (97)    |
| Dengue            | 2 (129)                                        | 2 (128)    | 3 ## (127)  | 2 (126)    | 3 (126)     | 3 ## (125) | 3 ## (128)  | 4 (123)    | 3 ## (129)  | 3 ## (126) |
| Rabies            | 6 # (118)                                      | 6 # (118)  | 6 * (117)   | 6 # (117)  | 5 * (120)   | 6 * (118)  | 5 (122)     | 5 * (118)  | 4 (125)     | 5 (120)    |
| Nematode          | 14 (109)                                       | 8 (113)    | 14 (108)    | 8 (113)    | 14 (108)    | 8 (113)    | 14 (107)    | 8 (114)    | 15 (110)    | 8 (113)    |
| FBT               | 120 (53)                                       | 114 (57)   | 110 (61)    | 108 (61)   | 96 (67)     | 96 (66)    | 84 (76)     | 81 (75)    | 75 (84)     | 70 (81)    |
| Oth NTD           | 23 (103)                                       | 22 (101)   | 12 (111)    | 17 (108)   | 9 (116)     | 7 (115)    | 6 (119)     | 5 (117)    | 7 (119)     | 3 (123)    |
| Preterm           | 31 (98)                                        | 32 (96)    | 30 (100)    | 30 (97)    | 28 (101)    | 29 (101)   | 26 (99)     | 27 (98)    | 24 (102)    | 24 (98)    |
| N Enceph          | 46 (83)                                        | 46 (81)    | 40 (96)     | 40 (90)    | 33 (96)     | 34 (96)    | 26 (97)     | 27 (97)    | 21 (103)    | 21 (101)   |

Table S1. Cont.

| Short Cause Names | Average DALYs per 100,000 (Rank in 136 causes) |           |             |            |             |            |            |            |             |            |
|-------------------|------------------------------------------------|-----------|-------------|------------|-------------|------------|------------|------------|-------------|------------|
|                   | 60–64 Years                                    |           | 65–69 Years |            | 60–64 Years |            | 75–79years |            | 60–64 Years |            |
|                   | 2015                                           | 2020      | 2015        | 2020       | 2015        | 2020       | 2015       | 2020       | 2015        | 2020       |
| PEM               | 8 (113)                                        | 5 (122)   | 13 * (109)  | 7 (114)    | 18 (106)    | 11 * (108) | 34 # (94)  | 17 (105)   | 69 * (87)   | 36 # (94)  |
| Iodine            | 20 (104)                                       | 19 (103)  | 20 (106)    | 19 (106)   | 20 (105)    | 19 (105)   | 19 (104)   | 18 (103)   | 19 (105)    | 18 (103)   |
| Vit A             | 0 (134)                                        | 0 (134)   | 0 (134)     | 0 (134)    | 0 (133)     | 0 (134)    | 0 (132)    | 0 (132)    | 0 (132)     | 0 (132)    |
| Iron              | 56 (77)                                        | 49 (80)   | 60 (77)     | 47 (86)    | 52 (87)     | 52 (86)    | 62 (86)    | 43 (92)    | 89 # (74)   | 55 (90)    |
| Oth Nutr          | 2 (127)                                        | 2 (130)   | 3 * (124)   | 2 (127)    | 4 (123)     | 3 * (124)  | 6 ## (115) | 3 (124)    | 12 * (114)  | 6 ## (116) |
| STD               | 2 (131)                                        | 2 (127)   | 3 (128)     | 1 (131)    | 2 (131)     | 1 (129)    | 2 (130)    | 1 (130)    | 1 (130)     | 1 (130)    |
| Hep               | 293 * (30)                                     | 313 (32)  | 293 # (34)  | 345 * (30) | 296 # (35)  | 337 # (33) | 255 # (39) | 342 # (35) | 210 (48)    | 286 # (39) |
| Leprosy           | 0 (136)                                        | 0 (136)   | 0 (135)     | 0 (136)    | 0 (135)     | 0 (135)    | 0 (134)    | 0 (134)    | 0 (134)     | 0 (134)    |
| Oth Inf           | 68 (70)                                        | 62 * (73) | 90 (66)     | 79 (70)    | 105 (63)    | 109 (63)   | 119 (61)   | 131 (61)   | 141 (59)    | 151 (56)   |

\*  $0.35 < C \leq 0.5$ , the fitting effect is eligible; #  $0.5 < C \leq 0.65$ , the fitting effect is below standard, but not the worst; ##  $C > 0.65$ , the fitting effect is fairly unsatisfactory. The average DALYs (per 100,000) are rounded to the nearest integers in the table, and the rank lists are got according to the original data. The full cause names are presented in Table S5.

Table S2. Disability adjusted life years (DALYs) for 28 neoplasms.

| Short Cause Names | Average DALYs per 100,000 (Rank in 136 Causes) |           |             |          |             |            |             |             |              |             |
|-------------------|------------------------------------------------|-----------|-------------|----------|-------------|------------|-------------|-------------|--------------|-------------|
|                   | 60–64 Years                                    |           | 65–69 Years |          | 70–74 Years |            | 75–79 Years |             | 80–84 Years  |             |
|                   | 2015                                           | 2020      | 2015        | 2020     | 2015        | 2020       | 2015        | 2020        | 2015         | 2020        |
| Esophagus         | 1362 (9)                                       | 1584 (9)  | 1764 (9)    | 1990 (9) | 1829 * (10) | 2341 (9)   | 1702 * (11) | 2135 * (10) | 1465 ## (15) | 1776 * (16) |
| Stomach           | 1694 (7)                                       | 1352 (10) | 2407 (7)    | 2138 (8) | 2934 (5)    | 3003 (5)   | 3075 * (7)  | 3479 (5)    | 2770 ## (8)  | 3384 * (7)  |
| Liver             | 2532 (5)                                       | 2807 (5)  | 2602 (6)    | 2969 (5) | 2524 (8)    | 2858 (7)   | 2173 * (9)  | 2620 (9)    | 1936 (13)    | 2117 * (10) |
| Larynx            | 114 (58)                                       | 157 (47)  | 141 (50)    | 175 (47) | 144 (51)    | 194 (44)   | 139 (55)    | 174 (51)    | 111 # (67)   | 150 (57)    |
| Lung              | 3628 (2)                                       | 3915 (2)  | 4796 (3)    | 5630 (2) | 5643 (4)    | 6993 (3)   | 5912 (4)    | 7616 (4)    | 5324 (4)     | 7296 (4)    |
| Breast            | 432 (23)                                       | 595 (19)  | 321 # (28)  | 495 (24) | 255 ## (39) | 325 # (34) | 216 (47)    | 244 ## (43) | 208 (49)     | 204 (50)    |
| Cervix            | 158 (46)                                       | 262 (35)  | 130 (53)    | 184 (44) | 118 ## (59) | 133 (55)   | 105 * (65)  | 114 ## (63) | 111 * (66)   | 97 * (69)   |

Table S2. Cont.

| Short Cause Names | Average DALYs per 100,000 (Rank in 136 Causes) |            |             |            |             |             |             |             |             |             |
|-------------------|------------------------------------------------|------------|-------------|------------|-------------|-------------|-------------|-------------|-------------|-------------|
|                   | 60–64 Years                                    |            | 65–69 Years |            | 70–74 Years |             | 75–79 Years |             | 80–84 Years |             |
|                   | 2015                                           | 2020       | 2015        | 2020       | 2015        | 2020        | 2015        | 2020        | 2015        | 2020        |
| Uterus            | 105 (61)                                       | 143 (51)   | 84 (69)     | 154 (53)   | 79 (76)     | 101 (64)    | 65 (84)     | 87 (70)     | 60 # (88)   | 66 (83)     |
| Prostate          | 14 # (108)                                     | 11 (109)   | 53 (84)     | 28 # (99)  | 135 (54)    | 124 (59)    | 220 (46)    | 305 (36)    | 291 (36)    | 441 (33)    |
| Colorectal        | 813 (15)                                       | 746 (15)   | 1079 (13)   | 1075 (15)  | 1373 (12)   | 1401 (12)   | 1586 (13)   | 1750 (11)   | 1677 (14)   | 1947 (14)   |
| Mouth             | 111 (59)                                       | 170 (45)   | 105 * (63)  | 155 (52)   | 113 (60)    | 130 * (56)  | 115 * (63)  | 134 (59)    | 102 # (71)  | 133 * (61)  |
| Naso              | 223 * (35)                                     | 274 (34)   | 213 (41)    | 246 * (39) | 212 ## (43) | 223 (42)    | 170 ## (51) | 220 ## (47) | 125 # (61)  | 164 ## (54) |
| Oth Pharynx       | 42 (86)                                        | 58 (74)    | 37 * (97)   | 59 (77)    | 28 (100)    | 44 * (91)   | 25 (102)    | 27 (96)     | 28 * (99)   | 23 (100)    |
| Gallbladder       | 167 (44)                                       | 180 (42)   | 224 (39)    | 256 (38)   | 284 (36)    | 322 (35)    | 354 (33)    | 386 (33)    | 359 (34)    | 466 (32)    |
| Pancreas          | 430 (25)                                       | 504 (22)   | 544 (23)    | 685 (21)   | 601 (24)    | 794 (22)    | 608 (27)    | 795 (23)    | 545 (31)    | 737 (26)    |
| Melanoma          | 37 (93)                                        | 42 (85)    | 42 (91)     | 54 (79)    | 48 (91)     | 58 (80)     | 60 (87)     | 66 (82)     | 70 (86)     | 81 (77)     |
| NMSC              | 20 (105)                                       | 17 (104)   | 23 (103)    | 27 (101)   | 34 (94)     | 29 (100)    | 40 (93)     | 44 (91)     | 50 (92)     | 50 (91)     |
| Ovary             | 166 * (45)                                     | 252 (36)   | 140 # (52)  | 198 * (42) | 111 * (62)  | 144 # (53)  | 103 # (66)  | 103 * (67)  | 87 * (76)   | 94 # (70)   |
| Testis            | 1 (132)                                        | 1 (131)    | 1 (131)     | 1 (132)    | 3 * (127)   | 1 (131)     | 5 ## (121)  | 4 * (122)   | 3 ## (127)  | 6 ## (117)  |
| Kidney            | 252 (33)                                       | 340 (29)   | 273 (35)    | 406 (27)   | 300 (34)    | 396 (29)    | 303 (35)    | 408 (32)    | 288 (37)    | 387 (35)    |
| Bladder           | 85 (68)                                        | 78 (67)    | 128 (54)    | 122 (58)   | 193 (46)    | 178 (48)    | 286 (37)    | 262 (39)    | 375 (33)    | 391 (34)    |
| Brain             | 274 (31)                                       | 315 (30)   | 312 (30)    | 308 (32)   | 333 (31)    | 342 (32)    | 316 ## (34) | 353 (34)    | 222 (45)    | 317 ## (37) |
| Thyroid           | 53 (79)                                        | 57 (75)    | 60 (76)     | 74 (72)    | 69 (81)     | 77 (75)     | 81 (77)     | 86 (71)     | 80 (79)     | 99 (68)     |
| Hodgkin's         | 4 ## (124)                                     | 3 (123)    | 4 # (120)   | 4 ## (123) | 5 (121)     | 4 # (120)   | 6 # (117)   | 5 (119)     | 6 (120)     | 6 # (118)   |
| Lymphoma          | 153 (47)                                       | 147 (49)   | 203 (42)    | 202 (41)   | 215 (42)    | 267 (39)    | 222 (44)    | 261 (40)    | 204 (50)    | 253 (43)    |
| Myeloma           | 64 (74)                                        | 54 (77)    | 86 (68)     | 98 (64)    | 99 (65)     | 126 (58)    | 99 (69)     | 134 (60)    | 78 * (81)   | 122 (63)    |
| Leukemia          | 181 # (41)                                     | 138 * (52) | 228 ## (38) | 181 # (45) | 251 (40)    | 243 ## (40) | 231 * (41)  | 273 (37)    | 214 # (46)  | 239 * (45)  |
| Oth Neoplasm      | 620 * (18)                                     | 631 * (17) | 727 # (18)  | 709 * (20) | 757 ## (20) | 795 # (21)  | 684 ## (24) | 782 ## (24) | 644 ## (26) | 647 ## (29) |

\*  $0.35 < C \leq 0.5$ , the fitting effect is eligible; #  $0.5 < C \leq 0.65$ , the fitting effect is below standard, but not the worst; ##  $C > 0.65$ , the fitting effect is fairly unsatisfactory.

The average DALYs (per 100,000) are rounded to the nearest integers in the table, and the rank lists are got according to the original data. The full cause names are presented in Table S5.

**Table S3.** Disability adjusted life years (DALYs) for 63 non-communicable diseases excluding neoplasms.

| Short Cause Names | Average DALYs per 100,000 (Rank in 136 Causes) |             |             |            |             |            |             |           |             |             |
|-------------------|------------------------------------------------|-------------|-------------|------------|-------------|------------|-------------|-----------|-------------|-------------|
|                   | 60–64 Years                                    |             | 65–69 Years |            | 70–74 Years |            | 75–79 Years |           | 80–84 Years |             |
|                   | 2015                                           | 2020        | 2015        | 2020       | 2015        | 2020       | 2015        | 2020      | 2015        | 2020        |
| Rheum HD          | 204 (37)                                       | 118 (55)    | 248 (37)    | 175 (46)   | 314 (32)    | 207 (43)   | 369 (32)    | 265 (38)  | 429 (32)    | 313 (38)    |
| IHD               | 3454 (3)                                       | 3373 (3)    | 5140 (2)    | 4718 (3)   | 7184 (2)    | 7020 (2)   | 9751 (3)    | 9673 (2)  | 12960 (3)   | 12895 (3)   |
| Stroke            | 6385 (1)                                       | 6910 (1)    | 9395 (1)    | 9021 (1)   | 13155 (1)   | 12662 (1)  | 17985 (1)   | 16930 (1) | 23183 (1)   | 22519 (1)   |
| HTN Heart         | 530 (20)                                       | 557 (21)    | 836 (17)    | 799 (18)   | 1230 (14)   | 1215 (15)  | 1795 (10)   | 1683 (12) | 2379 (9)    | 2401 (9)    |
| CMP               | 118 * (56)                                     | 104 * (60)  | 157 * (48)  | 126 * (57) | 199 (45)    | 173 * (49) | 225 (43)    | 226 (44)  | 249 (43)    | 247 (44)    |
| AFib              | 102 (63)                                       | 103 (61)    | 172 (46)    | 165 (48)   | 276 (38)    | 283 (38)   | 427 (31)    | 445 (31)  | 606 (29)    | 678 (27)    |
| AA                | 186 (40)                                       | 184 (41)    | 300 (33)    | 261 (37)   | 500 (28)    | 429 (28)   | 743 (23)    | 734 (25)  | 849 (21)    | 1078 (19)   |
| PVD               | 37 (92)                                        | 69 (71)     | 57 (80)     | 65 (76)    | 86 (73)     | 94 (68)    | 136 (57)    | 138 (57)  | 197 (51)    | 220 (48)    |
| Endocarditis      | 25 * (101)                                     | 23 * (100)  | 42 (93)     | 20 * (105) | 55 (85)     | 41 (94)    | 59 (88)     | 60 (83)   | 81 (78)     | 63 (85)     |
| Oth Circ          | 432 (24)                                       | 607 (18)    | 556 (22)    | 721 (19)   | 770 (19)    | 1008 (18)  | 1030 (18)   | 1463 (15) | 1386 (16)   | 2004 (11)   |
| COPD              | 2238 (6)                                       | 1645 (8)    | 4092 (4)    | 2827 (6)   | 6652 (3)    | 5354 (4)   | 10626 (2)   | 8451 (3)  | 14010 (2)   | 13247 (2)   |
| P-coniosis        | 32 (97)                                        | 29 (97)     | 44 (89)     | 43 (87)    | 72 (80)     | 56 (82)    | 86 (75)     | 93 (69)   | 92 * (72)   | 102 (67)    |
| Asthma            | 83 (69)                                        | 76 (68)     | 105 (62)    | 86 (68)    | 159 (49)    | 111 (61)   | 239 (40)    | 179 (50)  | 319 (35)    | 278 (41)    |
| Int Lung          | 38 (91)                                        | 36 (90)     | 53 (83)     | 54 (80)    | 77 (78)     | 75 (76)    | 118 (62)    | 107 (65)  | 143 (58)    | 169 (53)    |
| Oth Resp          | 194 (39)                                       | 198 (39)    | 259 (36)    | 265 (36)   | 376 (30)    | 378 (30)   | 548 (29)    | 569 (29)  | 769 (23)    | 838 (21)    |
| Cirrhosis-HepB    | 314 * (28)                                     | 310 (33)    | 316 * (29)  | 317 * (31) | 302 (33)    | 291 * (36) | 273 (38)    | 260 (41)  | 244 (44)    | 222 (46)    |
| Cirrhosis-HepC    | 148 (48)                                       | 148 (48)    | 155 * (49)  | 155 (51)   | 153 (50)    | 147 * (51) | 141 (54)    | 136 (58)  | 129 (60)    | 117 (64)    |
| Cirrhosis-Alcohol | 130 * (52)                                     | 131 * (53)  | 112 (59)    | 115 * (59) | 97 (66)     | 91 (70)    | 90 (72)     | 74 (77)   | 89 (75)     | 68 (82)     |
| Cirrhosis-Other   | 54 (78)                                        | 54 * (76)   | 40 (95)     | 43 (88)    | 29 (99)     | 29 (99)    | 25 (100)    | 20 (101)  | 28 (98)     | 17 (104)    |
| PUD               | 47 (82)                                        | 36 (91)     | 61 (75)     | 37 (92)    | 83 (74)     | 48 (88)    | 110 (64)    | 67 (81)   | 144 (56)    | 90 (72)     |
| Gastritis         | 5 * (120)                                      | 11 ## (110) | 1 (130)     | 3 * (124)  | 9 (114)     | 0 (132)    | 12 ## (112) | 9 (110)   | 20 (104)    | 11 ## (109) |
| Appendicitis      | 3 (126)                                        | 1 (132)     | 3 (125)     | 2 (128)    | 5 (122)     | 2 (126)    | 5 (120)     | 4 (121)   | 9 (116)     | 4 (121)     |
| Ileus             | 27 ## (99)                                     | 19 ## (102) | 42 * (90)   | 29 ## (98) | 52 (88)     | 48 * (89)  | 81 * (79)   | 57 (84)   | 120 (63)    | 94 * (71)   |
| I+F Hernia        | 18 (107)                                       | 15 (106)    | 22 (105)    | 22 (104)   | 25 (102)    | 26 (102)   | 30 (96)     | 29 (95)   | 35 (95)     | 33 (95)     |
| IBD               | 32 ## (96)                                     | 36 (89)     | 28 * (102)  | 32 ## (95) | 25 (103)    | 26 * (103) | 26 (98)     | 22 (100)  | 32 (96)     | 24 (99)     |

Table S3. Cont.

| Short Cause Names | Average DALYs per 100,000 (Rank in 136 Causes) |             |             |            |             |             |             |           |             |           |
|-------------------|------------------------------------------------|-------------|-------------|------------|-------------|-------------|-------------|-----------|-------------|-----------|
|                   | 60–64 Years                                    |             | 65–69 Years |            | 70–74 Years |             | 75–79 Years |           | 80–84 Years |           |
|                   | 2015                                           | 2020        | 2015        | 2020       | 2015        | 2020        | 2015        | 2020      | 2015        | 2020      |
| Vasc Intest       | 26 (100)                                       | 28 (98)     | 52 (86)     | 37 (93)    | 89 (70)     | 83 (74)     | 122 (60)    | 141 (56)  | 153 (55)    | 180 (52)  |
| Gall + Bile       | 64 (73)                                        | 52 (78)     | 93 (65)     | 71 (73)    | 130 (56)    | 110 (62)    | 162 (53)    | 158 (54)  | 210 (47)    | 194 (51)  |
| Pancreatitis      | 35 (94)                                        | 33 (93)     | 41 (94)     | 39 (91)    | 50 (89)     | 46 (90)     | 64 (85)     | 55 (86)   | 77 (82)     | 73 (80)   |
| Oth Diges         | 237 (34)                                       | 197 * (40)  | 304 (32)    | 270 (35)   | 394 (29)    | 352 (31)    | 470 (30)    | 463 (30)  | 629 (27)    | 539 (31)  |
| Alzh              | 201 (38)                                       | 171 * (44)  | 310 (31)    | 353 (29)   | 528 (27)    | 502 (26)    | 1048 (16)   | 884 (20)  | 2082 (12)   | 1905 (15) |
| Parkins           | 38 * (89)                                      | 33 (95)     | 63 (74)     | 50 * (82)  | 123 (57)    | 89 (72)     | 213 (48)    | 194 (49)  | 286 (38)    | 346 (36)  |
| Epilepsy          | 86 (67)                                        | 73 (70)     | 82 (71)     | 75 (71)    | 78 (77)     | 73 (77)     | 86 (73)     | 70 (80)   | 89 (73)     | 82 (76)   |
| MS                | 19 # (106)                                     | 14 # (107)  | 14 * (107)  | 18 # (107) | 12 * (112)  | 11 * (109)  | 4 (123)     | 9 * (108) | 7 (118)     | 2 (127)   |
| Migraine          | 171 (42)                                       | 198 # (38)  | 141 (51)    | 159 (49)   | 112 (61)    | 126 (57)    | 92 (71)     | 98 (68)   | 80 (80)     | 79 (78)   |
| Headache          | 33 (95)                                        | 33 (94)     | 33 (99)     | 33 (94)    | 32 (97)     | 32 (97)     | 31 (95)     | 31 (94)   | 31 (97)     | 31 (96)   |
| Oth Neuro         | 103 (62)                                       | 102 (63)    | 125 (56)    | 150 (54)   | 130 (55)    | 173 (50)    | 126 (58)    | 167 (53)  | 115 (65)    | 149 (58)  |
| Schizo            | 420 * (26)                                     | 490 (23)    | 328 (27)    | 391 * (28) | 246 (41)    | 287 (37)    | 186 (49)    | 203 (48)  | 144 (57)    | 148 (59)  |
| Alcohol           | 314 # (29)                                     | 384 ## (28) | 216 (40)    | 293 # (33) | 135 (53)    | 182 (47)    | 81 (78)     | 104 (66)  | 53 (91)     | 58 (88)   |
| Drugs             | 39 (88)                                        | 42 (84)     | 23 (104)    | 26 (103)   | 14 (107)    | 15 (106)    | 14 (108)    | 9 (112)   | 13 (112)    | 10 (110)  |
| Unipolar          | 1155 (11)                                      | 1185 (11)   | 1066 # (14) | 1165 (13)  | 928 (16)    | 1045 # (16) | 824 (20)    | 875 (21)  | 865 * (20)  | 759 (23)  |
| Bipolar           | 144 (50)                                       | 159 (46)    | 117 (58)    | 115 (60)   | 96 (68)     | 94 (67)     | 76 (82)     | 78 (76)   | 59 (89)     | 62 (87)   |
| Anxiety           | 218 (36)                                       | 232 * (37)  | 201 (43)    | 209 (40)   | 184 (48)    | 190 (45)    | 170 (52)    | 172 (52)  | 160 (54)    | 158 (55)  |
| Eat Disorder      | 5 (121)                                        | 5 (119)     | 4 (123)     | 4 (121)    | 3 (124)     | 3 (121)     | 3 (125)     | 3 (125)   | 5 ## (124)  | 3 (124)   |
| PDD               | 101 (64)                                       | 103 (62)    | 94 (64)     | 97 (65)    | 88 (72)     | 90 (71)     | 81 (80)     | 84 (74)   | 71 (85)     | 76 (79)   |
| Child Behav       | 0 (135)                                        | 0 (135)     | 0 (136)     | 0 (135)    | 0 (136)     | 0 (136)     | – (–)       | – (–)     | – (–)       | – (–)     |
| Intellect         | 2 (130)                                        | 3 (124)     | 1 (133)     | 1 (130)    | 0 (134)     | 0 (133)     | 0 (133)     | 0 (133)   | 0 (133)     | 0 (133)   |
| Oth Mental        | 23 * (102)                                     | 16 ## (105) | 33 (98)     | 26 * (102) | 44 (93)     | 39 (95)     | 54 (90)     | 54 (87)   | 76 (83)     | 65 (84)   |
| Diabetes          | 1655 (8)                                       | 1653 (7)    | 2157 (8)    | 2144 (7)   | 2733 (7)    | 2764 (8)    | 3252 (5)    | 3447 (6)  | 3628 (6)    | 3995 (6)  |
| Glom              | 8 (114)                                        | 5 (120)     | 9 (114)     | 6 (119)    | 13 (111)    | 6 (117)     | 17 (106)    | 9 (109)   | 19 (106)    | 13 (108)  |
| CKD               | 474 (21)                                       | 394 (27)    | 661 (20)    | 569 (22)   | 827 (18)    | 822 (20)    | 958 (19)    | 1022 (17) | 1125 (17)   | 1163 (18) |

Table S3. Cont.

| Short Cause Names | Average DALYs per 100,000 (Rank in 136 Causes) |             |             |           |             |           |             |           |             |           |
|-------------------|------------------------------------------------|-------------|-------------|-----------|-------------|-----------|-------------|-----------|-------------|-----------|
|                   | 60–64 Years                                    |             | 65–69 Years |           | 70–74 Years |           | 75–79 Years |           | 80–84 Years |           |
|                   | 2015                                           | 2020        | 2015        | 2020      | 2015        | 2020      | 2015        | 2020      | 2015        | 2020      |
| Urinary           | 659 (17)                                       | 746 (16)    | 724 (19)    | 1110 (14) | 717 (22)    | 1032 (17) | 676 (25)    | 886 (19)  | 617 (28)    | 754 (24)  |
| Gynecol Dis       | 100 (65)                                       | 88 (65)     | 75 (72)     | 81 (69)   | 30 (98)     | 60 (79)   | 13 (111)    | 19 (102)  | 18 (108)    | 7 (114)   |
| Hemog             | 90 # (66)                                      | 76 ## (69)  | 125 (55)    | 95 # (67) | 141 (52)    | 142 (54)  | 180 (50)    | 157 (55)  | 260 (41)    | 205 (49)  |
| Oth Endo          | 146 (49)                                       | 145 (50)    | 176 (45)    | 187 (43)  | 204 (44)    | 224 (41)  | 228 (42)    | 258 (42)  | 254 (42)    | 281 (40)  |
| R Arthritis       | 132 (51)                                       | 115 (56)    | 159 (47)    | 158 (50)  | 192 (47)    | 188 (46)  | 222 (45)    | 225 (45)  | 282 (40)    | 259 (42)  |
| Osteo             | 1288 (10)                                      | 2433 (6)    | 1138 (12)   | 1701 (10) | 1055 (15)   | 1295 (13) | 1042 (17)   | 1113 (16) | 1056 (18)   | 1073 (20) |
| Low Back + Neck   | 2790 (4)                                       | 3019 (4)    | 2838 (5)    | 2986 (4)  | 2920 (6)    | 2985 (6)  | 3024 (8)    | 3051 (7)  | 3127 (7)    | 3152 (8)  |
| Gout              | 5 (122)                                        | 6 (116)     | 5 (119)     | 6 (116)   | 6 (118)     | 6 (116)   | 6 (116)     | 7 (116)   | 6 (122)     | 7 (115)   |
| Oth Musculo       | 760 (16)                                       | 572 ## (20) | 1031 (15)   | 856 (17)  | 1243 (13)   | 1245 (14) | 1236 (15)   | 1505 (14) | 893 ## (19) | 1404 (17) |
| Congenital        | 58 (75)                                        | 44(83)      | 56 (81)     | 56 (78)   | 50 (90)     | 55 (84)   | 43 (92)     | 48 (90)   | 38 (94)     | 41 (93)   |
| Skin D            | 471 (22)                                       | 430 * (25)  | 529 (24)    | 494 (25)  | 572 (25)    | 565 (23)  | 630 (26)    | 609 (26)  | 727 (24)    | 672 (28)  |
| Sense Org         | 920 (14)                                       | 798 (14)    | 1394 (10)   | 1171 (12) | 2213 (9)    | 1836 (10) | 3098 (6)    | 3036 (8)  | 3848 (5)    | 4183 (5)  |
| Oral Cond         | 413 (27)                                       | 414 (26)    | 467 (25)    | 453 (26)  | 538 (26)    | 512 (25)  | 579 (28)    | 591 (28)  | 564 * (30)  | 622 (30)  |

\*  $0.35 < C \leq 0.5$ , the fitting effect is eligible; #  $0.5 < C \leq 0.65$ , the fitting effect is below standard, but not the worst; ##  $C > 0.65$ , the fitting effect is fairly unsatisfactory. The average DALYs (per 100,000) are rounded to the nearest integers in the table, and the rank lists are got according to the original data. The full cause names are presented in Table S5.

Table S4. Disability adjusted life years (DALYs) for 12 injuries.

| Short Cause Names | Average DALYs per 100,000 (Rank in 136 Causes) |            |             |             |             |           |             |            |             |           |
|-------------------|------------------------------------------------|------------|-------------|-------------|-------------|-----------|-------------|------------|-------------|-----------|
|                   | 60–64 Years                                    |            | 65–69 Years |             | 70–74 Years |           | 75–79 Years |            | 80–84 Years |           |
|                   | 2015                                           | 2020       | 2015        | 2020        | 2015        | 2020      | 2015        | 2020       | 2015        | 2020      |
| Road Inj          | 1098 * (12)                                    | 1138 (12)  | 952 (16)    | 1044 * (16) | 891 * (17)  | 888 (19)  | 790 (21)    | 844 * (22) | 710 (25)    | 748 (25)  |
| Oth Trans         | 68 ## (71)                                     | 80 ## (66) | 55 # (82)   | 65 ## (75)  | 47 (92)     | 51 # (87) | 47 (91)     | 41 (93)    | 49 # (93)   | 43 (92)   |
| Fall              | 1046 (13)                                      | 1028 (13)  | 1200 (11)   | 1247 (11)   | 1373 (11)   | 1421 (11) | 1663 (12)   | 1612 (13)  | 2270 (11)   | 1968 (12) |

Table S4. Cont.

| Short Cause Names | Average DALYs per 100,000 (Rank in 136 Causes) |            |             |          |                       |           |                      |                       |                        |                      |
|-------------------|------------------------------------------------|------------|-------------|----------|-----------------------|-----------|----------------------|-----------------------|------------------------|----------------------|
|                   | 60–64 Years                                    |            | 65–69 Years |          | 70–74 Years           |           | 75–79 Years          |                       | 80–84 Years            |                      |
|                   | 2015                                           | 2020       | 2015        | 2020     | 2015                  | 2020      | 2015                 | 2020                  | 2015                   | 2020                 |
| Drown             | 116 (57)                                       | 91 (64)    | 124 (57)    | 102 (62) | 122 (58)              | 113 (60)  | 136 (56)             | 110 (64)              | 171 <sup>#</sup> (53)  | 130(62)              |
| Fire              | 45 (85)                                        | 41 (88)    | 46 * (88)   | 42 (89)  | 54 <sup>##</sup> (86) | 44 * (92) | 78 <sup>#</sup> (81) | 54 <sup>##</sup> (88) | 108 (69)               | 86 <sup>#</sup> (73) |
| Poison            | 120 (54)                                       | 114 * (58) | 110 (60)    | 100 (63) | 102 (64)              | 92 (69)   | 101 (68)             | 84 (72)               | 103 (70)               | 86 (74)              |
| Mech Force        | 67 (72)                                        | 67 (72)    | 42 (92)     | 53 (81)  | 33 (95)               | 30 (98)   | 25 (101)             | 24 (99)               | 28 (100)               | 19 (102)             |
| Med Treat         | 52 (80)                                        | 42 (86)    | 65 (73)     | 69 (74)  | 88 (71)               | 87 (73)   | 86 (74)              | 124 (62)              | 108 (68)               | 110 (65)             |
| Animal            | 14 (110)                                       | 10 (112)   | 13 (110)    | 12 (109) | 11 (113)              | 10 (111)  | 11 (113)             | 8 (113)               | 12 (113)               | 8 (112)              |
| Oth Unintent      | 119 (55)                                       | 108 * (59) | 86 * (67)   | 95 (66)  | 91 (69)               | 64 * (78) | 96 * (70)            | 74 (78)               | 116 <sup>#</sup> (64)  | 83 * (75)            |
| Self-harm         | 587 (19)                                       | 431 (24)   | 614 (21)    | 534 (23) | 642 (23)              | 560 (24)  | 776 * (22)           | 596 (27)              | 820 <sup>##</sup> (22) | 764 * (22)           |
| Violence          | 40 (87)                                        | 34 (92)    | 29 (101)    | 27 (100) | 24 (104)              | 20 (104)  | 19 (105)             | 17 (106)              | 16 (109)               | 13 (107)             |

\*  $0.35 < C \leq 0.5$ , the fitting effect is eligible. <sup>#</sup>  $0.5 < C \leq 0.65$ , the fitting effect is below standard, but not the worst. <sup>##</sup>  $C > 0.65$ , the fitting effect is fairly unsatisfactory. The average DALYs (per 100,000) are rounded to the nearest integers in the table, and the rank lists are got according to the original data. The full cause names are presented in Table S5.

**Table S5.** The full names of 136 predicted causes.

| <b>Short Cause Names</b> | <b>Full Cause Names</b>                         |
|--------------------------|-------------------------------------------------|
| AA                       | Aortic aneurysm                                 |
| AFib                     | Atrial fibrillation and flutter                 |
| Alcohol                  | Alcohol use disorders                           |
| Alzh                     | Alzheimer's disease and other dementias         |
| Animal                   | Animal contact                                  |
| Anxiety                  | Anxiety disorders                               |
| Appendicitis             | Appendicitis                                    |
| Asthma                   | Asthma                                          |
| Bipolar                  | Bipolar affective disorder                      |
| Bladder                  | Bladder cancer                                  |
| Brain                    | Brain and nervous system cancers                |
| Breast                   | Breast cancer                                   |
| Cervix                   | Cervical cancer                                 |
| Child Behav              | Childhood behavioral disorders                  |
| Cirrhosis-Alcohol        | Cirrhosis of the liver secondary to alcohol use |
| Cirrhosis-HepB           | Cirrhosis of the liver secondary to hepatitis B |
| Cirrhosis-HepC           | Cirrhosis of the liver secondary to hepatitis C |
| Cirrhosis-Other          | Other cirrhosis of the liver                    |
| CKD                      | Chronic kidney diseases                         |
| CMP                      | Cardiomyopathy and myocarditis                  |
| Colorectal               | Colon and rectum cancers                        |
| Congenital               | Congenital anomalies                            |
| COPD                     | COPD                                            |
| Cysticer                 | Cysticercosis                                   |
| Dengue                   | Dengue                                          |
| Diabetes                 | Diabetes mellitus                               |
| Diarrhea                 | Diarrheal diseases                              |
| Drown                    | Drowning                                        |
| Drugs                    | Drug use disorders                              |
| Eat Disorder             | Eating disorders                                |
| Echino                   | Echinococcosis                                  |
| Enceph                   | Encephalitis                                    |
| Endocarditis             | Endocarditis                                    |
| Epilepsy                 | Epilepsy                                        |
| Esophagus                | Esophageal cancer                               |
| Fall                     | Falls                                           |
| FBT                      | Food-borne trematodiasis                        |
| Fire                     | Fire, heat and hot substances                   |
| Gall + Bile              | Gall bladder and bile duct disease              |
| Gallbladder              | Gallbladder and biliary tract cancer            |
| Gastritis                | Gastritis and duodenitis                        |
| Glom                     | Acute glomerulonephritis                        |
| Gout                     | Gout                                            |
| Gynecol Dis              | Gynecological diseases                          |



Table S5. Cont.

| Short Cause Names | Full Cause Names                                          |
|-------------------|-----------------------------------------------------------|
| Headache          | Tension-type headache                                     |
| Short Cause Names | Full Cause Names                                          |
| Hemog             | Hemoglobinopathies and hemolytic anemias                  |
| Hep               | Hepatitis                                                 |
| HIV               | HIV/AIDS                                                  |
| Hodgkin's         | Hodgkin's disease                                         |
| HTN Heart         | Hypertensive heart disease                                |
| I+F Hernia        | Inguinal or femoral hernia                                |
| IBD               | Non-infective inflammatory bowel disease                  |
| IHD               | Ischemic heart disease                                    |
| Ileus             | Paralytic ileus and intestinal obstruction without hernia |
| Int Lung          | Interstitial lung disease and pulmonary sarcoidosis       |
| Intellect         | Idiopathic intellectual disability                        |
| Iodine            | Iodine deficiency                                         |
| Iron              | Iron-deficiency anemia                                    |
| Kidney            | Kidney and other urinary organ cancers                    |
| Larynx            | Larynx cancer                                             |
| Leish             | Leishmaniasis                                             |
| Leprosy           | Leprosy                                                   |
| Leukemia          | Leukemia                                                  |
| Liver             | Liver cancer                                              |
| Low Back + Neck   | Low back and neck pain                                    |
| LRI               | Lower respiratory infections                              |
| Lung              | Trachea, bronchus, and lung cancers                       |
| Lymphoma          | Non-Hodgkin lymphoma                                      |
| Malaria           | Malaria                                                   |
| Mech Force        | Exposure to mechanical forces                             |
| Med Treat         | Adverse effects of medical treatment                      |
| Melanoma          | Malignant melanoma of skin                                |
| Meningitis        | Meningitis                                                |
| Migraine          | Migraine                                                  |
| Mouth             | Mouth cancer                                              |
| MS                | Multiple sclerosis                                        |
| Myeloma           | Multiple myeloma                                          |
| N Enceph          | Neonatal encephalopathy (birth asphyxia and birth trauma) |
| Naso              | Nasopharynx cancer                                        |
| Nematode          | Intestinal nematode infections                            |
| NMSC              | Non-melanoma skin cancer                                  |
| Oral Cond         | Oral disorders                                            |
| Osteo             | Osteoarthritis                                            |
| Oth Circ          | Other cardiovascular and circulatory diseases             |
| Oth Diges         | Other digestive diseases                                  |
| Oth Endo          | Other endocrine, nutritional, blood, and immune disorders |

Table S5. Cont.

| Short Cause Names | Full Cause Names                                |
|-------------------|-------------------------------------------------|
| Oth Inf           | Other infectious diseases                       |
| Oth Mental        | Other mental and behavioral disorders           |
| Oth Musculo       | Other musculoskeletal disorders                 |
| Oth Neoplasm      | Other neoplasms                                 |
| Oth Neuro         | Other neurological disorders                    |
| Oth NTD           | Other neglected tropical diseases               |
| Oth Nutr          | Other nutritional deficiencies                  |
| Oth Pharynx       | Cancer of other part of pharynx and oropharynx  |
| Oth Resp          | Other chronic respiratory diseases              |
| Oth Trans         | Other transport injury                          |
| Oth Unintent      | Unintentional injuries not classified elsewhere |
| Otitis            | Otitis media                                    |
| Ovary             | Ovarian cancer                                  |
| Pancreas          | Pancreatic cancer                               |
| Pancreatitis      | Pancreatitis                                    |
| Parkins           | Parkinson's disease                             |
| P-coniosis        | Pneumoconiosis                                  |
| PDD               | Pervasive development disorders                 |
| PEM               | Protein-energy malnutrition                     |
| Poison            | Poisonings                                      |
| Preterm           | Preterm birth complications                     |
| Prostate          | Prostate cancer                                 |
| PUD               | Peptic ulcer disease                            |
| PVD               | Peripheral vascular disease                     |
| R Arthritis       | Rheumatoid arthritis                            |
| Rabies            | Rabies                                          |
| Rheum HD          | Rheumatic heart disease                         |
| Road Inj          | Road injury                                     |
| Schisto           | Schistosomiasis                                 |
| Schizo            | Schizophrenia                                   |
| Self-harm         | Self-harm                                       |
| Sense Org         | Sense organ diseases                            |
| Skin D            | Skin and subcutaneous diseases                  |
| STD               | Sexually transmitted diseases excluding HIV     |
| Stomach           | Stomach cancer                                  |
| Stroke            | Cerebrovascular disease                         |
| TB                | Tuberculosis                                    |
| Testis            | Testicular cancer                               |
| Tetanus           | Tetanus                                         |
| Thyroid           | Thyroid cancer                                  |
| Trachoma          | Trachoma                                        |
| Typhoid           | Typhoid and paratyphoid fevers                  |
| Unipolar          | Unipolar depressive disorders                   |

**Table S5.** *Cont.*

| <b>Short Cause Names</b> | <b>Full Cause Names</b>               |
|--------------------------|---------------------------------------|
| URI                      | Upper respiratory infections          |
| Urinary                  | Urinary diseases and male infertility |
| Uterus                   | Uterine cancer                        |
| Varicella                | Varicella                             |
| Vasc Intest              | Vascular disorders of intestine       |
| Violence                 | Interpersonal violence                |
| Vit A                    | Vitamin A deficiency                  |

© 2015 by the authors; licensee MDPI, Basel, Switzerland. This article is an open access article distributed under the terms and conditions of the Creative Commons Attribution license (<http://creativecommons.org/licenses/by/4.0/>).
